# Supplementary material
Source: PubMed Central journal article supplement (PMC4549172)

**Fig. S1**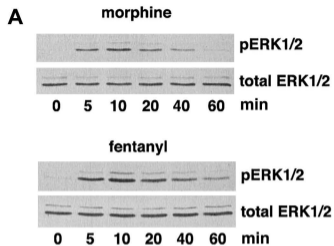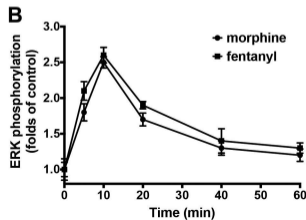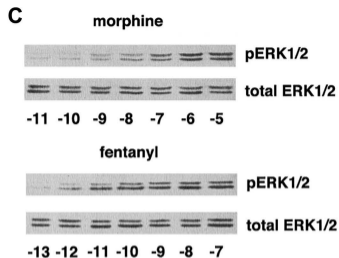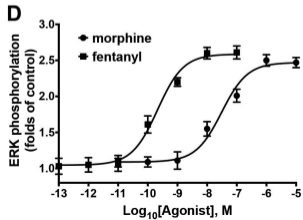

**Fig. S2**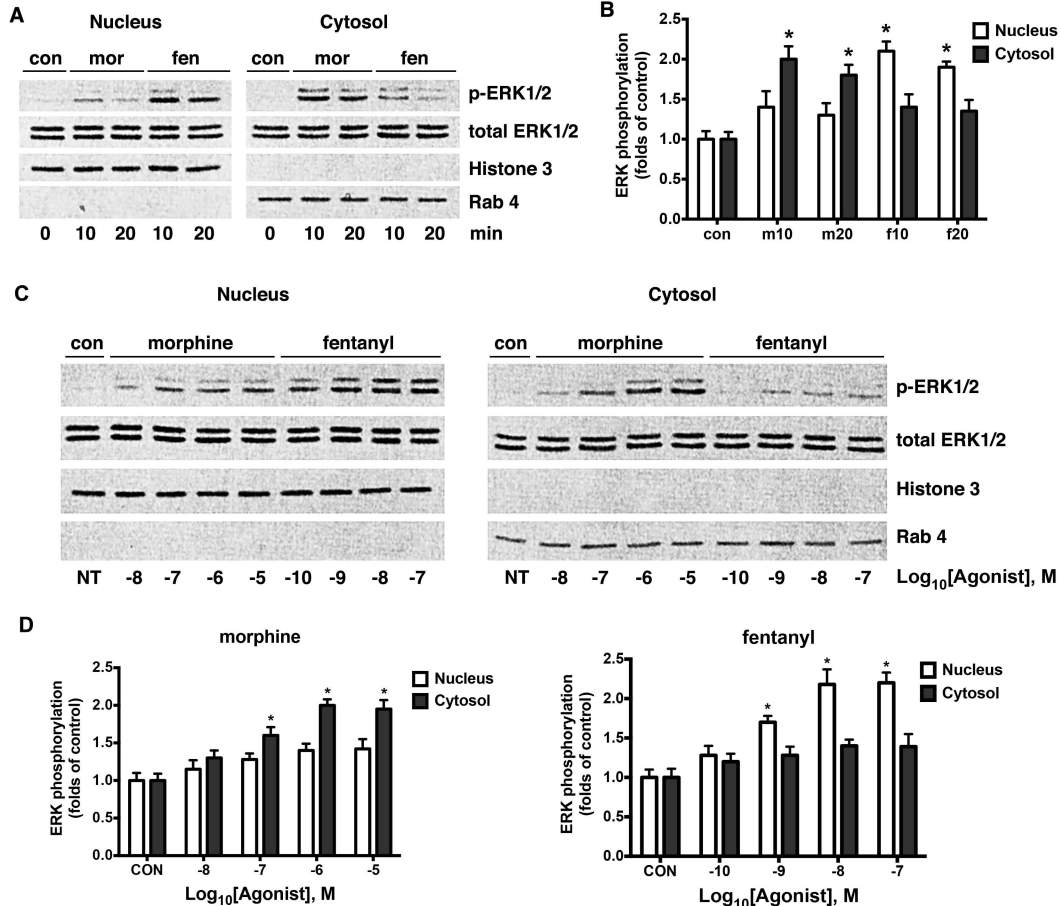

**Fig. S3****A.**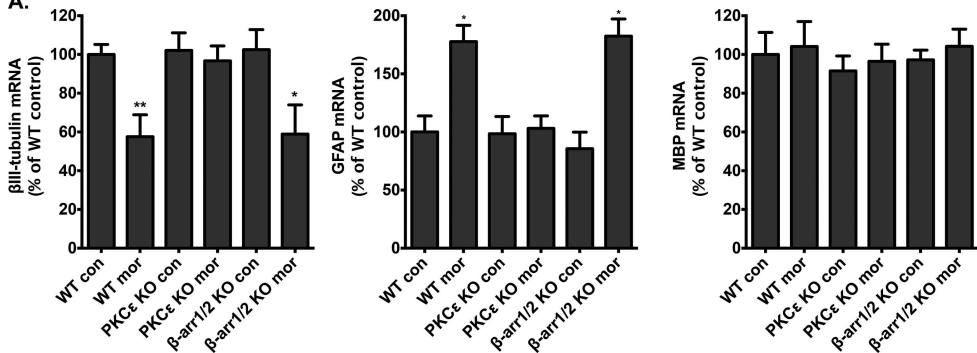**B.**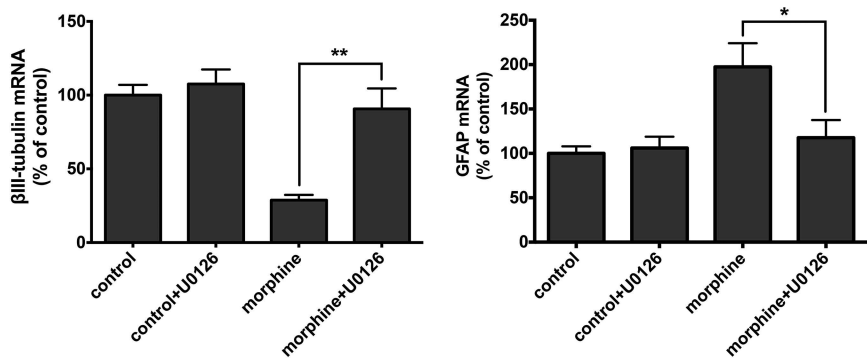

**Fig. S4**

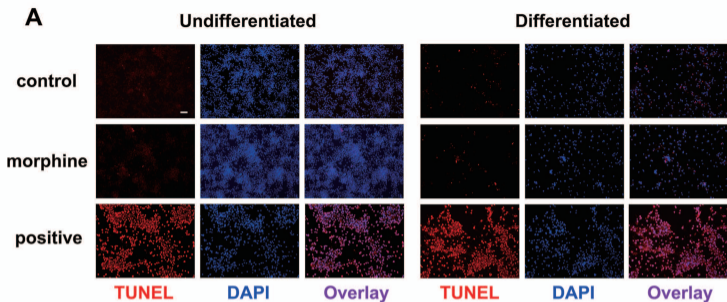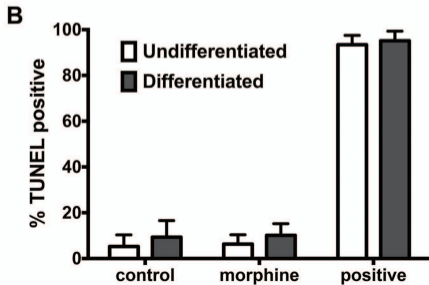

**Fig. S5****A**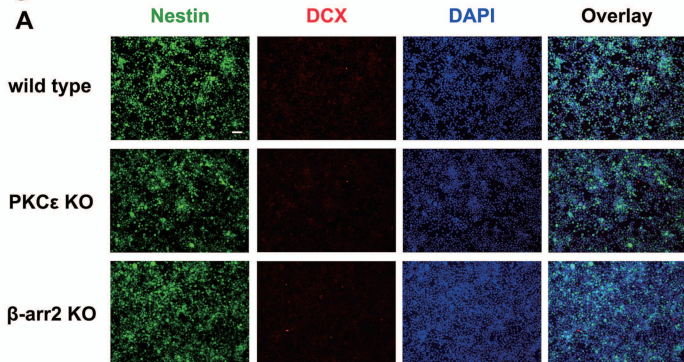**B**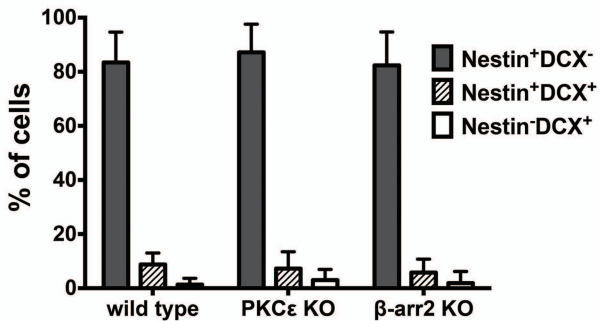

Supplement: NIHMS693400-supplement-Supp_FigureS1-S5.pdf [file NIHMS693400-supplement-Supp_FigureS1-S5.pdf]
